# Supplementary material for: Characteristics of bacterial and fungal communities and their associations with sugar compounds in atmospheric aerosols at a rural site in North China
Source: Copernicus journal article supplement (doi:10.5194/bg-2023-93), 2023-07-11
Supplement: Supplementary file 1 [file bg-2023-93-supplement.pdf]

*Supplement of*

**Characteristics of bacterial and fungal communities and their associations with sugar compounds in atmospheric aerosols at a rural site in North China**

Mutong Niu et al.

*Correspondence to:* W. Hu ([huwei@tju.edu.cn](mailto:huwei@tju.edu.cn)), P. Fu ([fupingqing@tju.edu.cn](mailto:fupingqing@tju.edu.cn))

The copyright of individual parts of the supplement might differ from the article licence.

**Table S1.** Reference samples used to trace the source of the airborne microbes obtained from the NCBI SRA repository (<http://www.ncbi.nlm.nih.gov/sra>).

| Accession number | Platform       | Sampling Site | Source |
|------------------|----------------|---------------|--------|
| Bacteria         |                |               |        |
| SRR6429182       | Illumina MiSeq | Bohai Sea     | Ocean  |
| SRR6429183       | Illumina MiSeq | Bohai Sea     | Ocean  |
| SRR6429184       | Illumina MiSeq | Bohai Sea     | Ocean  |
| SRR6429185       | Illumina MiSeq | Bohai Sea     | Ocean  |
| Fungi            |                |               |        |
| SRR5149688       | Illumina MiSeq | Bohai Sea     | Ocean  |
| SRR5149690       | Illumina MiSeq | Bohai Sea     | Ocean  |
| SRR5149691       | Illumina MiSeq | Bohai Sea     | Ocean  |
| SRR5149695       | Illumina MiSeq | Bohai Sea     | Ocean  |
| SRR5149697       | Illumina MiSeq | Bohai Sea     | Ocean  |

**Table S2.**  $\alpha$ -Diversity indices of airborne bacteria and fungi.

| Samples          | Tags         | OTU         | Chao1        | Shannon    | Simpson     |
|------------------|--------------|-------------|--------------|------------|-------------|
| Bacteria         |              |             |              |            |             |
| 0807D            | 27674        | 164         | 201.0        | 5.4        | 0.96        |
| 0807N            | 23442        | 381         | 458.0        | 6.7        | 0.96        |
| 0808D            | 42354        | 223         | 720.0        | 5.4        | 0.95        |
| 0808N            | 30991        | 1018        | 490.3        | 8.5        | 0.99        |
| 0809D            | 40535        | 377         | 602.1        | 5.9        | 0.96        |
| 0809N            | 47006        | 348         | 721.5        | 6.6        | 0.98        |
| 0810D            | 31402        | 235         | 781.6        | 5.7        | 0.94        |
| 0810N            | 27560        | 340         | 540.1        | 5.7        | 0.97        |
| 0811D            | 43710        | 308         | 1078.3       | 4.6        | 0.83        |
| 0811N            | 63049        | 669         | 495.2        | 8.1        | 0.99        |
| 0812D            | 41915        | 412         | 677.3        | 3.4        | 0.85        |
| 0812N            | 42050        | 335         | 756.0        | 6.5        | 0.98        |
| 0813D            | 49260        | 516         | 672.1        | 7.4        | 0.99        |
| 0813N            | 28961        | 336         | 425.5        | 6.0        | 0.95        |
| <b>Daytime</b>   | <b>39550</b> | <b>319</b>  | <b>675.1</b> | <b>5.4</b> | <b>0.93</b> |
| <b>Nighttime</b> | <b>37580</b> | <b>489</b>  | <b>555.2</b> | <b>6.8</b> | <b>0.97</b> |
| Fungi            |              |             |              |            |             |
| 0807D            | 27498        | 103         | 133.0        | 2.7        | 0.70        |
| 0807N            | 60901        | 445         | 332.5        | 4.0        | 0.83        |
| 0808D            | 30219        | 247         | 425.8        | 3.5        | 0.69        |
| 0808N            | 63457        | 465         | 469.1        | 3.9        | 0.8         |
| 0809D            | 114521       | 376         | 412.3        | 2.9        | 0.56        |
| 0809N            | 52159        | 464         | 396.2        | 4.2        | 0.81        |
| 0810D            | 69933        | 375         | 492.1        | 5.2        | 0.93        |
| 0810N            | 70349        | 473         | 568.5        | 4.9        | 0.90        |
| 0811D            | 62021        | 365         | 609.6        | 3.4        | 0.64        |
| 0811N            | 31324        | 558         | 628.8        | 4.1        | 0.74        |
| 0812D            | 50487        | 285         | 565.9        | 4.4        | 0.85        |
| 0812N            | 57687        | 450         | 702.0        | 4.4        | 0.86        |
| 0813D            | 54338        | 403         | 555.6        | 3.7        | 0.79        |
| 0813N            | 51989        | 472         | 619.9        | 4.8        | 0.90        |
| <b>Daytime</b>   | <b>58431</b> | <b>308*</b> | <b>456.3</b> | <b>3.7</b> | <b>0.74</b> |
| <b>Nighttime</b> | <b>55409</b> | <b>475*</b> | <b>531.0</b> | <b>4.3</b> | <b>0.83</b> |

**Table S3.** Concentrations of sugar components in aerosol samples.

| Compounds (ng m <sup>-3</sup> ) | Daytime (N = 7) |      |      |      | Nighttime (N = 7) |      |      |      |
|---------------------------------|-----------------|------|------|------|-------------------|------|------|------|
|                                 | Min             | Max  | Mean | SD   | Min               | Max  | Mean | SD   |
| <b>Anhydrosugars</b>            |                 |      |      |      |                   |      |      |      |
| levoglucosan                    | 10.3            | 30.3 | 18.4 | 7.43 | 2.97              | 55.8 | 30.0 | 20.1 |
| mannosan                        | 0.78            | 1.93 | 1.30 | 0.47 | 0.24              | 4.99 | 2.05 | 1.60 |
| galactosan                      | 0.55            | 0.96 | 0.68 | 0.15 | 0.21              | 3.01 | 1.41 | 0.98 |
| subtotal                        | 11.7            | 33.0 | 20.4 | 7.90 | 3.42              | 63.8 | 33.4 | 22.5 |
| <b>Primary sugars</b>           |                 |      |      |      |                   |      |      |      |
| xylose                          | 0.34            | 1.04 | 0.61 | 0.26 | 0.20              | 1.85 | 0.79 | 0.54 |
| fructose                        | 6.21            | 20.4 | 11.6 | 4.85 | 1.42              | 12.5 | 7.27 | 3.79 |
| glucose                         | 23.8            | 60.8 | 42.4 | 14.7 | 17.7              | 52.0 | 36.6 | 12.8 |
| sucrose                         | 0.59            | 111  | 67.6 | 35.8 | 1.27              | 65.3 | 28.6 | 23.5 |
| trehalose                       | 18.6            | 48.2 | 29.8 | 10.6 | 39.2              | 102  | 67.6 | 23.4 |
| subtotal                        | 100             | 228  | 152  | 49.0 | 78.4              | 190  | 141  | 47.2 |
| <b>Sugar alcohols</b>           |                 |      |      |      |                   |      |      |      |
| arabitol                        | 10.4            | 23.7 | 16.0 | 5.13 | 16.3              | 59.6 | 31.1 | 13.4 |
| mannitol                        | 26.7            | 55.9 | 41.5 | 10.7 | 68.7              | 128  | 101  | 21.9 |
| glycerol                        | 2.73            | 16.2 | 6.90 | 4.39 | 3.86              | 14.3 | 9.79 | 3.60 |
| erythritol                      | 3.65            | 6.47 | 4.76 | 1.11 | 5.65              | 18.1 | 11.9 | 4.37 |
| inositol                        | 1.96            | 10.4 | 4.84 | 2.67 | 1.29              | 5.22 | 3.34 | 1.37 |
| subtotal                        | 53.1            | 97.3 | 74.1 | 19.1 | 110               | 193  | 157  | 33.6 |
| $\Sigma$ saccharides            | 186             | 358  | 247  | 67.0 | 196               | 420  | 331  | 84.4 |

**Table S4.** Spearman correlation of sugar components and environmental or fungal  $\alpha$ -diversity indices.

| Factors                       | Anhyrosugars |          |              | Sugar alcohols |          |            |          | Primary saccharides |         |          |          |         |           |
|-------------------------------|--------------|----------|--------------|----------------|----------|------------|----------|---------------------|---------|----------|----------|---------|-----------|
|                               | Galactosan   | Mannosan | Levoglucosan | Arabitol       | Mannitol | Erythritol | Inositol | Glycerol            | Glucose | Sucrose  | Fructose | Xylose  | Trehalose |
| Galactosan                    | 1            |          |              |                |          |            |          |                     |         |          |          |         |           |
| Mannosan                      | 0.833**      | 1        |              |                |          |            |          |                     |         |          |          |         |           |
| Levoglucosan                  | 0.881**      | 0.916**  | 1            |                |          |            |          |                     |         |          |          |         |           |
| Arabitol                      | 0.547*       | 0.503    | 0.398        | 1              |          |            |          |                     |         |          |          |         |           |
| Mannitol                      | 0.569*       | 0.560*   | 0.477        | 0.864**        | 1        |            |          |                     |         |          |          |         |           |
| Erythritol                    | 0.459        | 0.411    | 0.477        | 0.719**        | 0.851**  | 1          |          |                     |         |          |          |         |           |
| Inositol                      | 0.2          | 0.516    | 0.433        | -0.086         | -0.064   | -0.051     | 1        |                     |         |          |          |         |           |
| Glycerol                      | 0.626*       | 0.473    | 0.38         | 0.688**        | 0.499    | 0.284      | -0.02    | 1                   |         |          |          |         |           |
| Glucose                       | 0.27         | 0.516    | 0.323        | 0.16           | 0.073    | -0.305     | 0.503    | 0.187               | 1       |          |          |         |           |
| Sucrose                       | -0.169       | 0.051    | 0.182        | -0.371         | -0.473   | -0.16      | 0.429    | -0.42               | -0.007  | 1        |          |         |           |
| Fructose                      | 0.407        | 0.662**  | 0.618*       | -0.134         | -0.13    | -0.108     | 0.754**  | -0.024              | 0.508   | 0.495    | 1        |         |           |
| Xylose                        | 0.727**      | 0.881**  | 0.921**      | 0.279          | 0.367    | 0.327      | 0.604*   | 0.244               | 0.525   | 0.292    | 0.771**  | 1       |           |
| Trehalose                     | 0.31         | 0.446    | 0.336        | 0.745**        | 0.877**  | 0.749**    | 0.09     | 0.275               | 0.156   | -0.275   | -0.103   | 0.332   | 1         |
| OC                            | 0.653*       | 0.855**  | 0.881**      | 0.429          | 0.385    | 0.433      | 0.411    | 0.288               | 0.341   | 0.411    | 0.622*   | 0.829** | 0.345     |
| EC                            | 0.789**      | 0.754**  | 0.811**      | 0.732**        | 0.666**  | 0.626*     | 0.015    | 0.565*              | 0.191   | 0.024    | 0.196    | 0.648*  | 0.459     |
| Cl <sup>-</sup>               | 0.829**      | 0.811**  | 0.749**      | 0.798**        | 0.719**  | 0.547*     | 0.116    | 0.789**             | 0.292   | -0.244   | 0.191    | 0.582*  | 0.49      |
| SO <sub>4</sub> <sup>2-</sup> | 0.446        | 0.705**  | 0.560*       | 0.187          | 0.125    | 0.055      | 0.587*   | 0.178               | 0.508   | 0.42     | 0.829**  | 0.670** | 0.156     |
| Ca <sup>2+</sup>              | 0.543*       | 0.534*   | 0.653*       | 0.556*         | 0.415    | 0.547*     | 0.218    | 0.367               | 0.055   | 0.358    | 0.138    | 0.486   | 0.415     |
| Temperature                   | -0.196       | 0.033    | 0.046        | -0.644*        | -0.670** | -0.604*    | 0.411    | -0.464              | 0.31    | 0.679**  | 0.631*   | 0.235   | -0.604*   |
| RH                            | 0.407        | 0.244    | 0.181        | 0.608*         | 0.806**  | 0.670**    | -0.297   | 0.445               | -0.207  | -0.705** | -0.313   | 0.053   | 0.698**   |
| Wind speed                    | -0.613*      | -0.49    | -0.675**     | -0.407         | -0.495   | -0.662**   | -0.029   | -0.244              | 0.213   | -0.046   | -0.015   | -0.415  | -0.376    |
| PM <sub>10</sub>              | 0.521        | 0.732**  | 0.609*       | 0.635*         | 0.53     | 0.336      | 0.288    | 0.389               | 0.640*  | 0.174    | 0.398    | 0.662** | 0.534*    |
| OTU                           | 0.552*       | 0.503    | 0.534*       | 0.679**        | 0.837**  | 0.785**    | 0.051    | 0.336               | -0.011  | -0.292   | -0.086   | 0.433   | 0.851**   |
| Shannon index                 | 0.415        | 0.424    | 0.257        | 0.402          | 0.516    | 0.095      | 0.125    | 0.292               | 0.604*  | -0.635*  | 0.015    | 0.279   | 0.525     |

Note: \* $p < 0.01$ ; \*\* $p < 0.05$ .

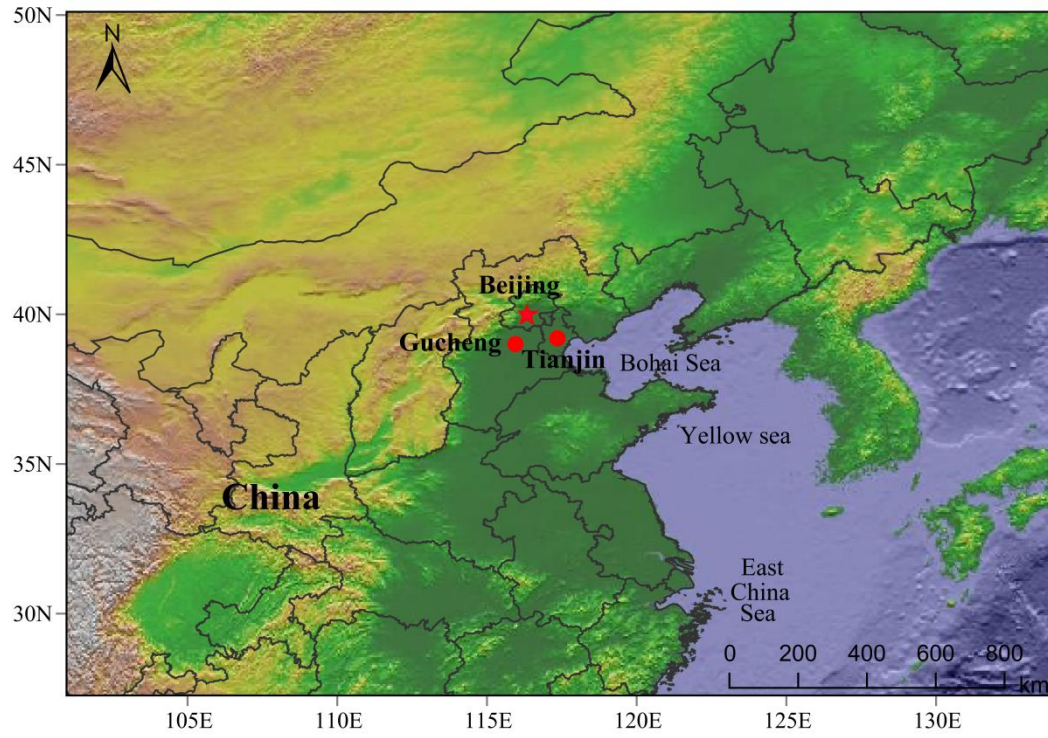

**Figure S1.** The geographical location of the observation site Gucheng (map from MeteoInfo software).

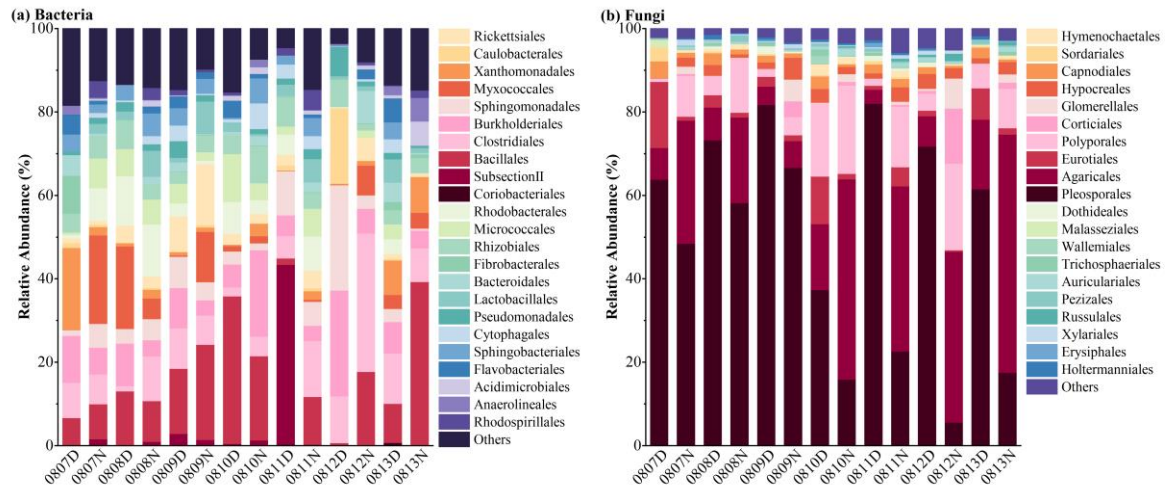

**Figure S2.** Relative abundances of airborne (a) bacteria and (b) fungi at the order level.

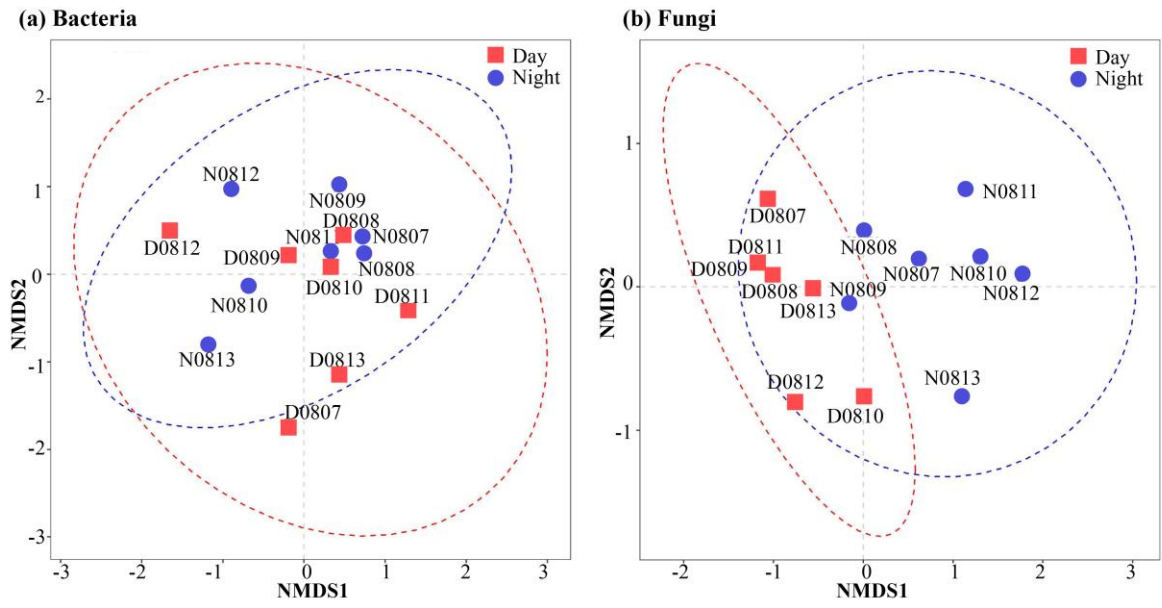

**Figure S3.** Comparison of the (a) bacterial and (b) fungal communities between in the daytime and nighttime samples, respectively.



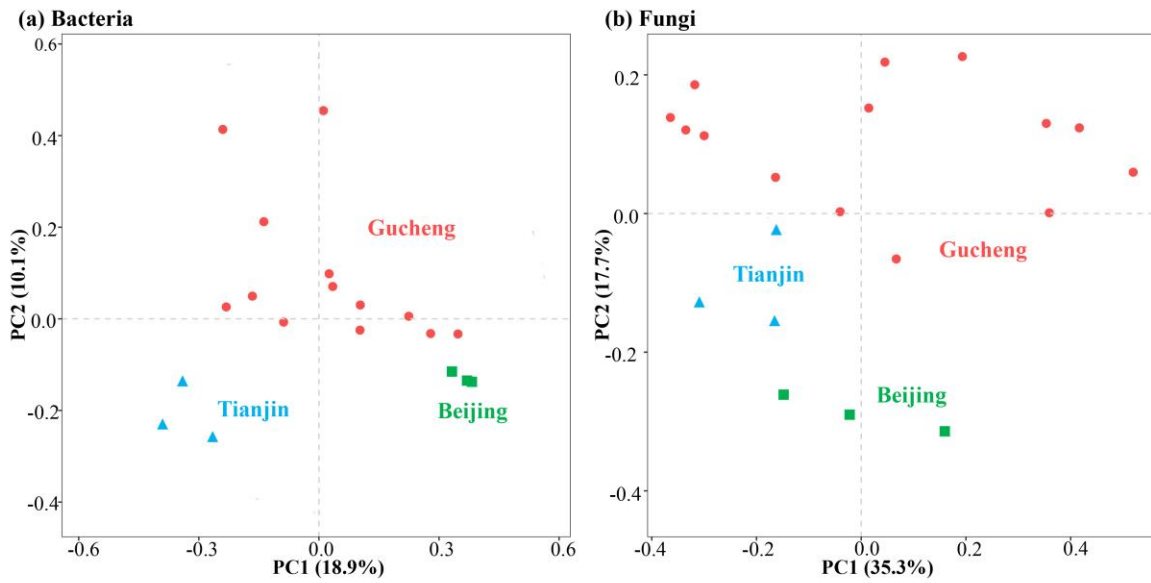

**Figure S4.** PCoA analysis of the (a) bacterial and (b) fungal communities collected from Beijing (39.99°N, 116.31°E, red), Tianjin (39.11°N, 117.17°E, blue) and Gucheng (the sampling site in this study, green), respectively.
